# Supplementary material for: Predicting Ligand Binding Sites on Protein Surfaces by 3-Dimensional Probability Density Distributions of Interacting Atoms
Source: PubMed Central journal article supplement (PMC4981321; doi:10.1371/journal.pone.0160315), 2016-08-11
Supplement: pone.0160315.s001.pdf [file pone.0160315.s001.pdf]

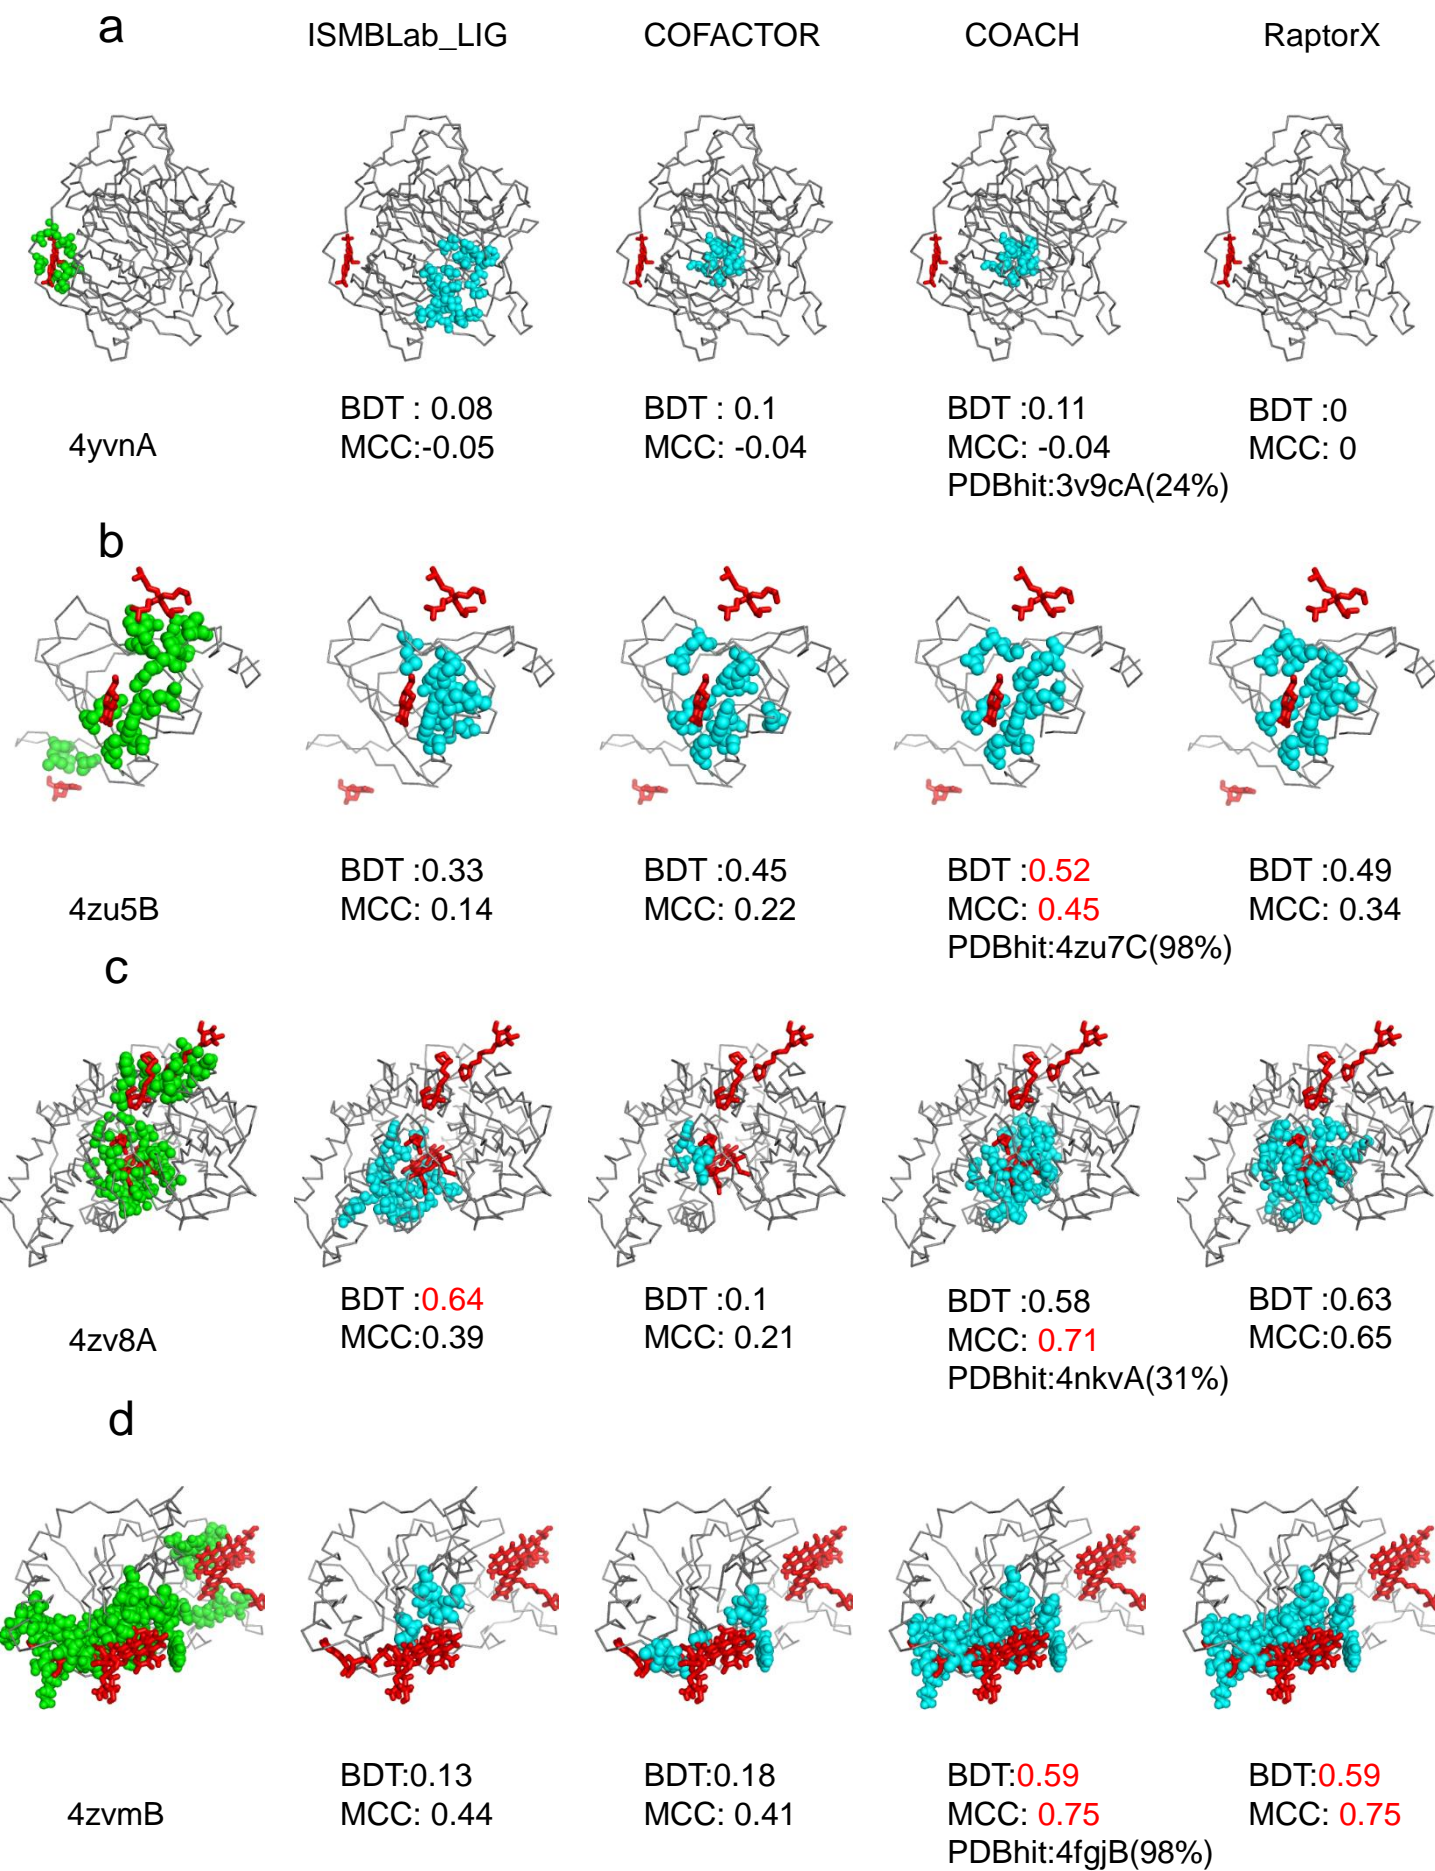

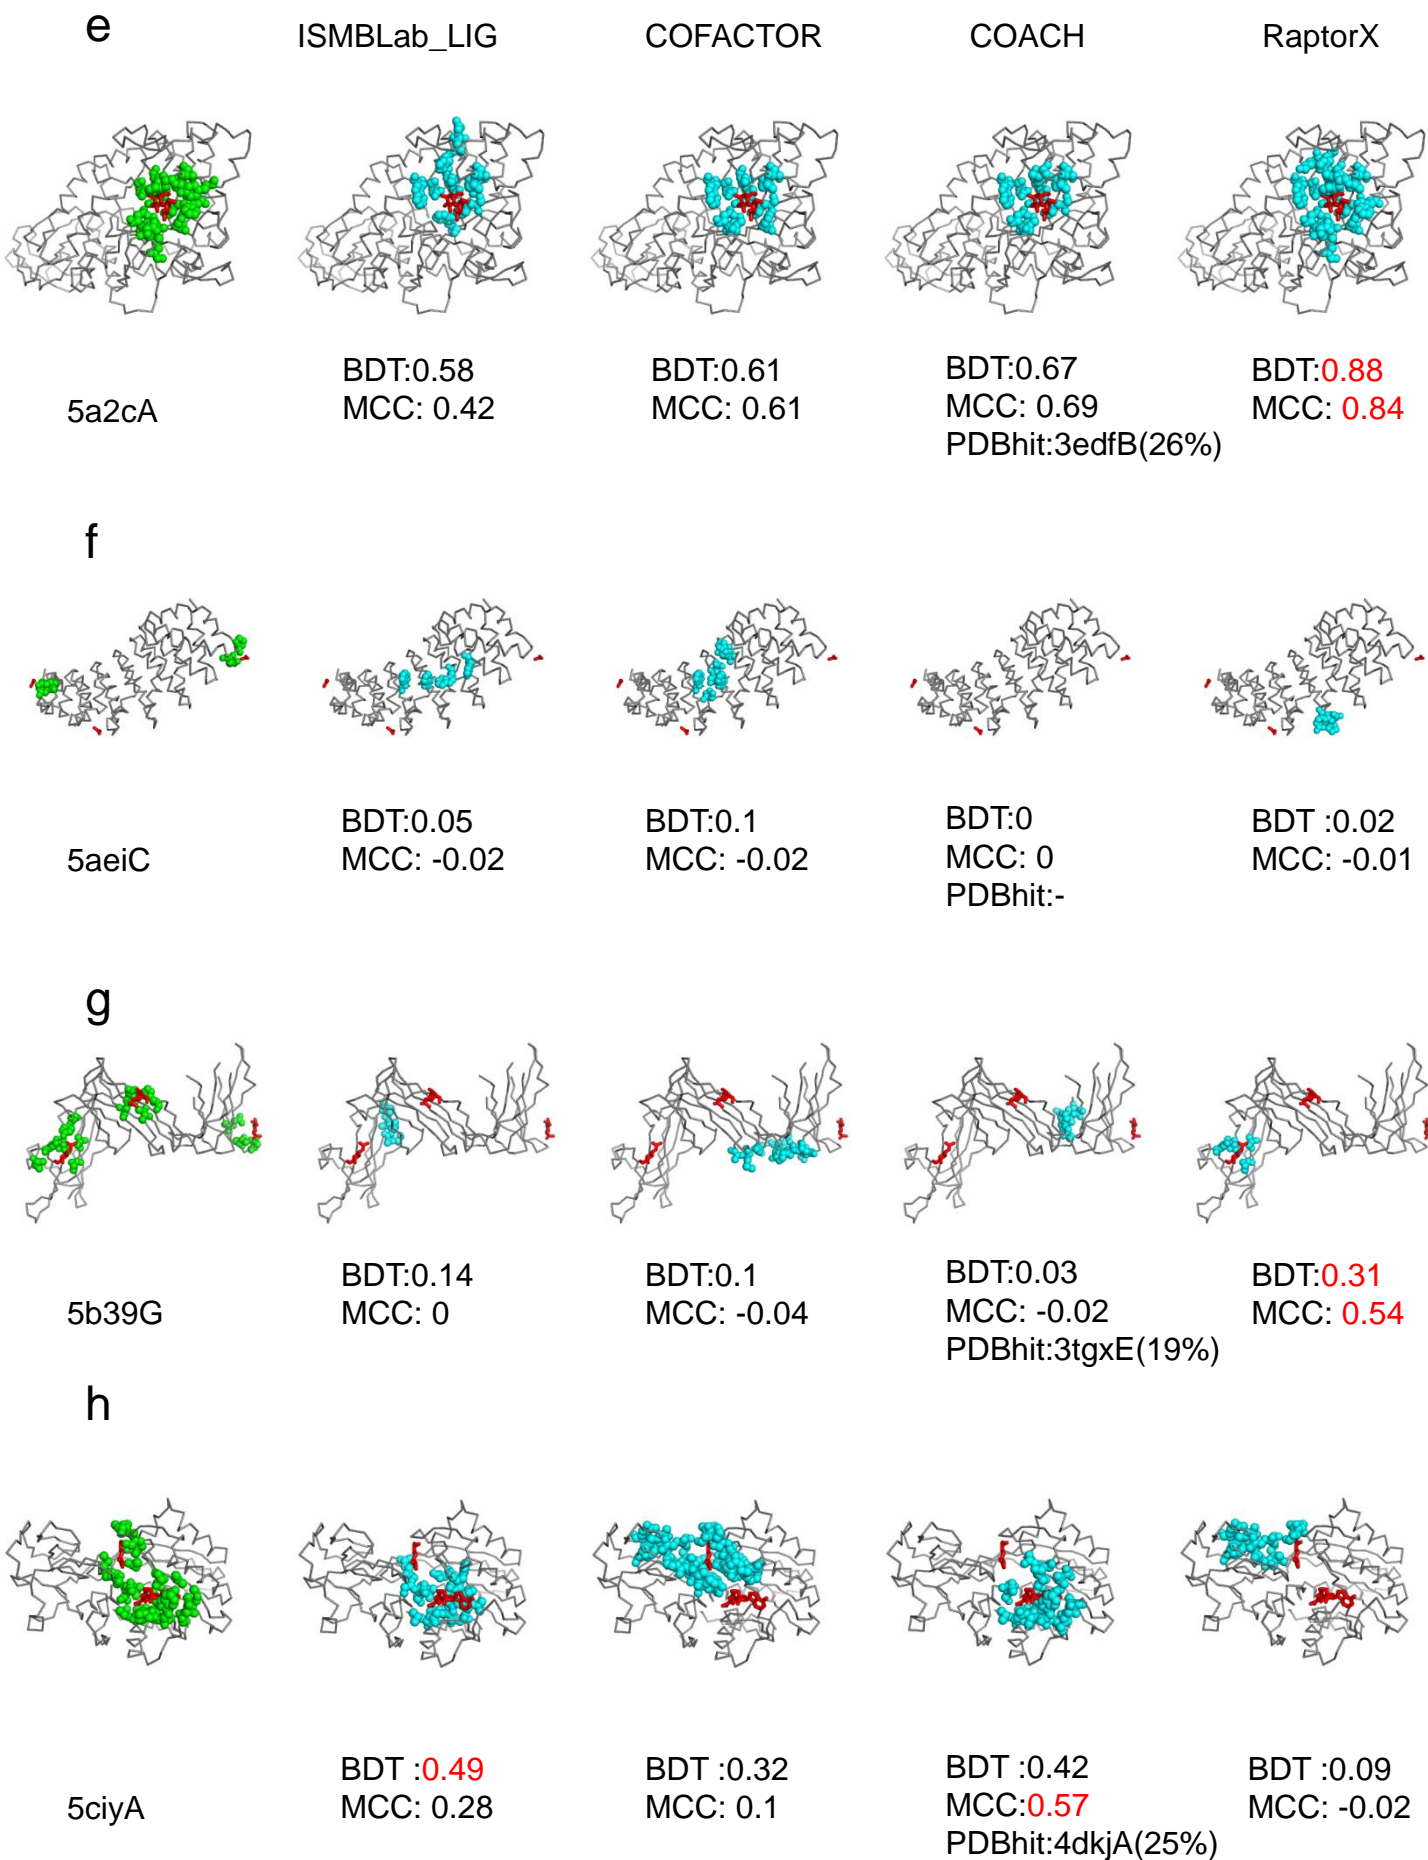

i

ISMBLab\_LIG

COFACTOR

COACH

RaptorX

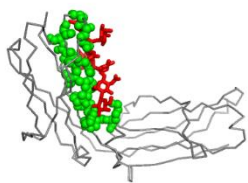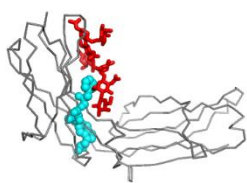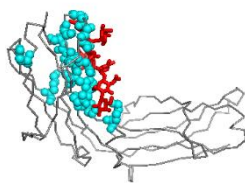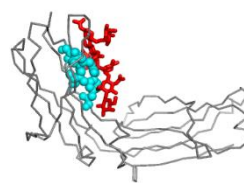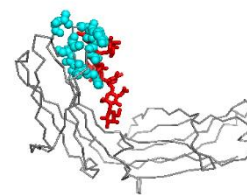

5djzA

BDT:0.32  
MCC: 0.13BDT: **0.61**  
MCC: **0.85**BDT: 0.36  
MCC: 0.58  
PDBhit:1h3wM(97%)BDT: 0.49  
MCC: 0.55

j

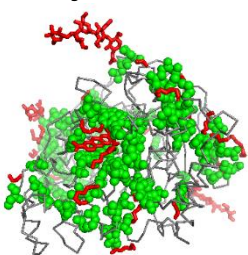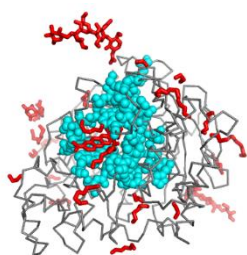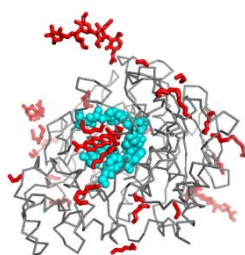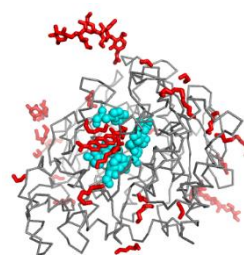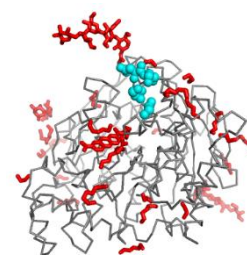

5e4tA

BDT: **0.34**  
MCC: 0.11BDT: 0.12  
MCC: **0.22**BDT: 0.1  
MCC: 0.2  
PDBhit:2bagA(100%)BDT:0.02  
MCC: -0.03

k

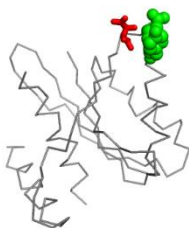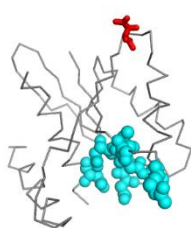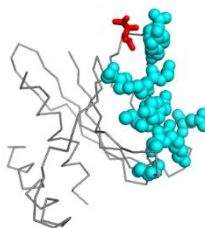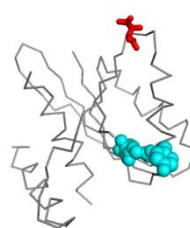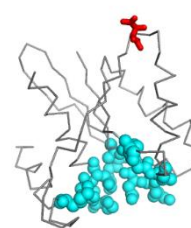

5e6fB

BDT:0.05  
MCC: -0.02BDT: **0.32**  
MCC: **0.41**BDT:0.06  
MCC: -0.02  
PDBhit:3ezwA (10%)BDT:0.04  
MCC: -0.04

l

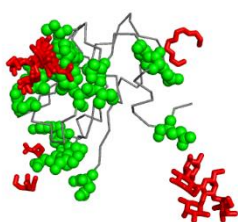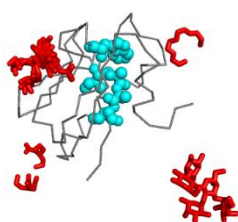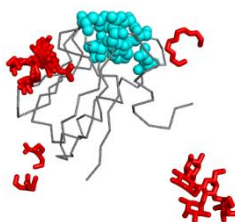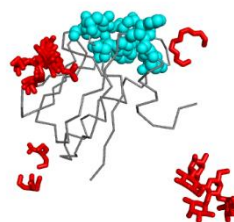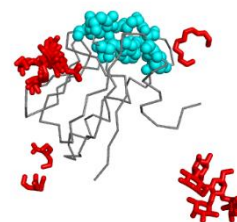

5elfJ

BDT: 0.08  
MCC: -0.11BDT:0.1  
MCC: -0.13BDT: 0.19  
MCC: -0.06  
PDBhit:1pziF(81%)BDT:0.16  
MCC: -0.05

## S1 Fig

m

ISMBLab\_LIG

COFACTOR

COACH

RaptorX

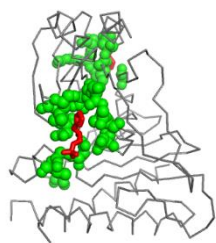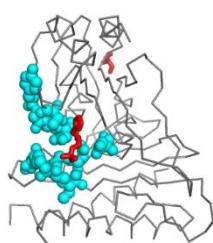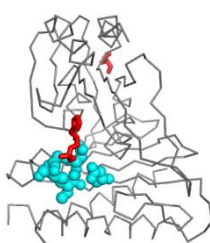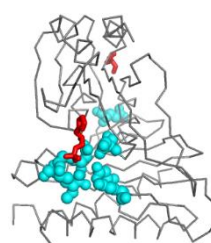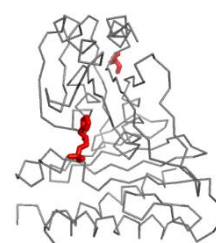

5eq9D

BDT: **0.56**  
MCC: 0.2BDT: 0.27  
MCC: 0.29BDT: 0.29  
MCC: **0.33**  
PDBhit:1nv6A(17%)BDT: 0  
MCC: 0

n

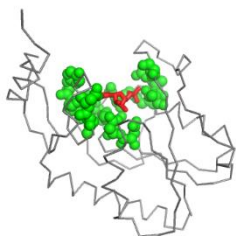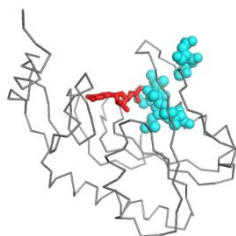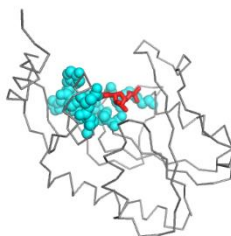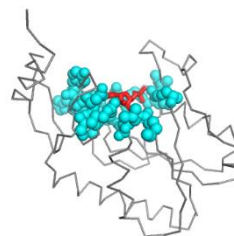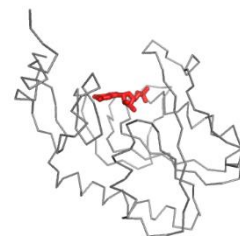

5esxB

BDT: 0.44  
MCC: 0.4BDT: 0.61  
MCC: 0.66BDT: **0.8**  
MCC: **0.69**  
PDBhit:4racA(25%)BDT: 0  
MCC: 0

o

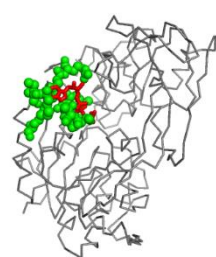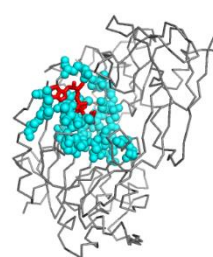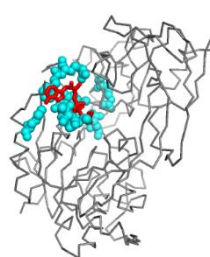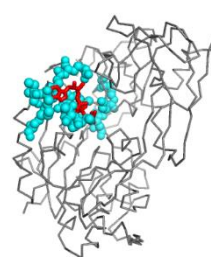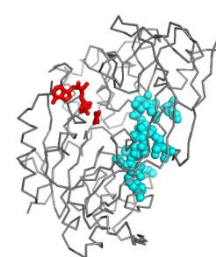

5fhfA

BDT: 0.55  
MCC: 0.53BDT: 0.8  
MCC: 0.74BDT: **0.86**  
MCC: **0.89**  
PDBhit:5ftbA(99%)BDT: 0.08  
MCC: -0.03

p

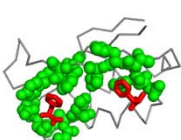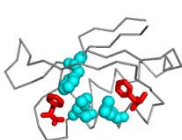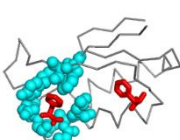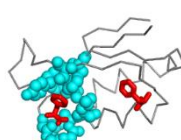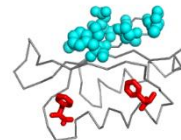

5fiiD

BDT:0.16  
MCC: 0.25BDT :0.6  
MCC: **0.76**BDT: **0.62**  
MCC:0.59  
PDBhit: 3mwbB(12%)BDT:0.17  
MCC: -0.15

q

ISMBLab\_LIG

COFACTOR

COACH

RaptorX

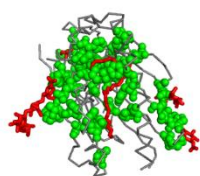

5fkpA

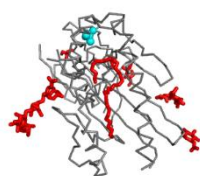BDT:0.14  
MCC: -0.03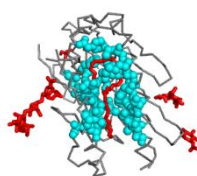BDT:0.38  
MCC:0.29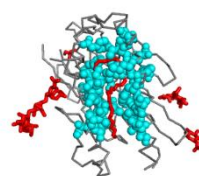BDT:0.43  
MCC:0.34  
PDBhit:4y16A(99%)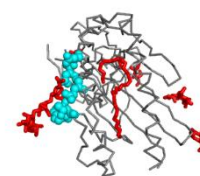BDT:0.3  
MCC:0.29

r

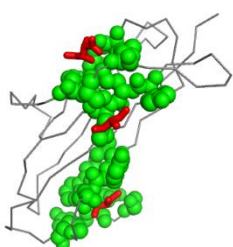

5fkpB

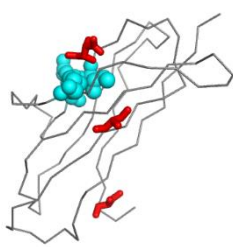BDT:0.16  
MCC:0.24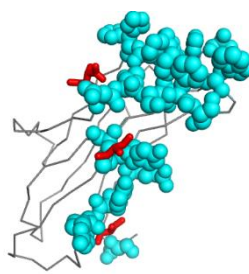BDT:0.55  
MCC:0.05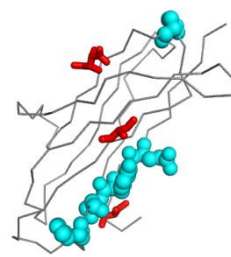BDT:0.2  
MCC:0.14  
PDBhit:4ra3C(69%)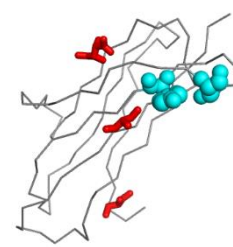BDT:0.1  
MCC:0.22

s

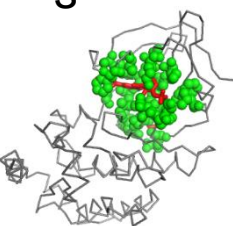

5hesB

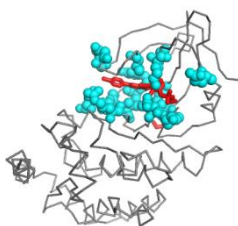BDT:0.76  
MCC:0.51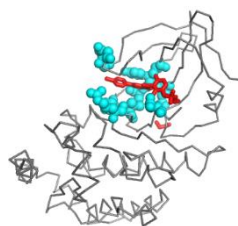BDT:0.34  
MCC:0.34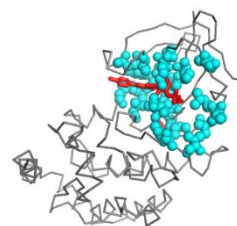BDT:0.81  
MCC:0.65  
PDBhit: 5e8yA (30%)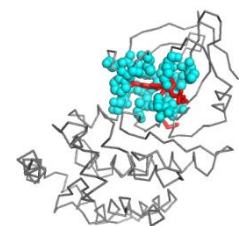BDT:0.70  
MCC:0.70

t

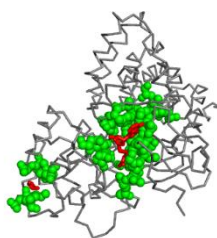

5hq8B

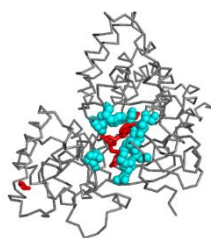BDT:0.62  
MCC:0.49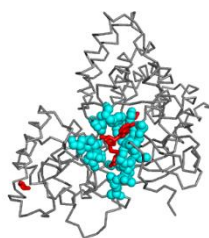BDT:0.5  
MCC:0.69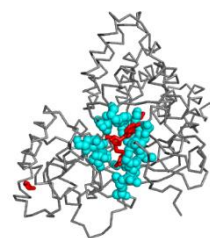BDT:0.48  
MCC:0.68  
PDBhit:3pdnA(99%)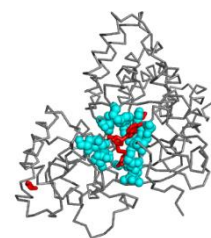BDT:0.42  
MCC:0.63

U

ISMBLab\_LIG

COFACTOR

COACH

RaptorX

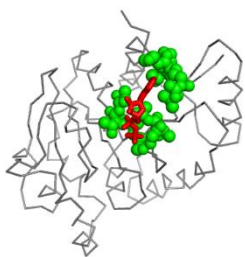

5ihpB

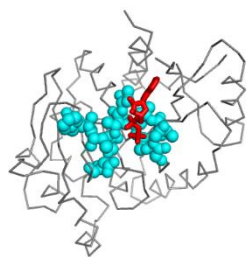MCC:0.5  
BDT:0.5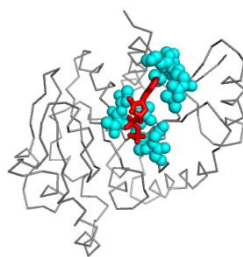BDT:0.88  
MCC:0.74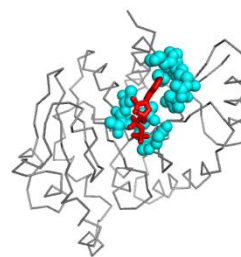BDT:0.97  
MCC:0.91  
PDBhit:1ionA(31%)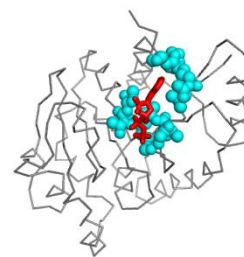BDT:0.91  
MCC:0.95

V

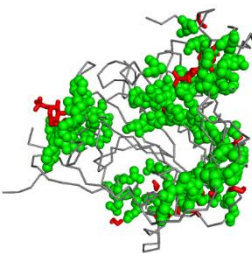

5in3B

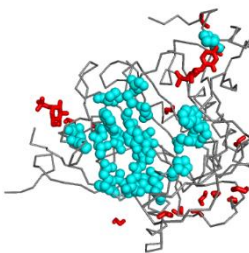BDT:0.1  
MCC: -0.02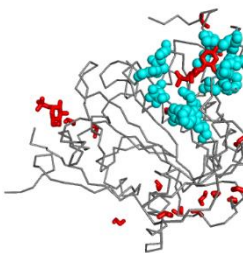BDT:0.14  
MCC:0.2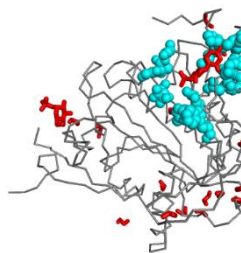BDT:0.18  
MCC:0.29  
PDBhit:1guqC(56%)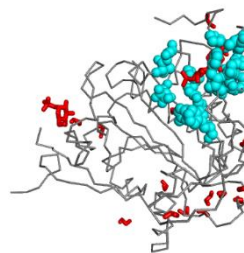BDT :0.25  
MCC:0.39
